# Supplementary material
Source: Springer Nature journal article supplement (https://www.springerprofessional.de/resource/supplementary/13638_2013_874_MOESM8_ESM.pdf/11899084)

**User 3 RX  
(UC)**

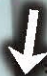

**User 3 TX  
(UDC)**

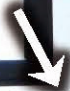

**Control &  
DSP PC**

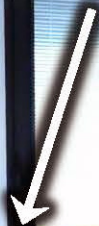

**User 2 RX  
(UC)**

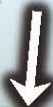

**User 1 RX  
(UC)**

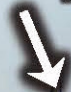

**User 1 TX  
(UDC)**

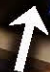

**User 2 TX  
(UDC)**

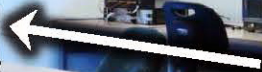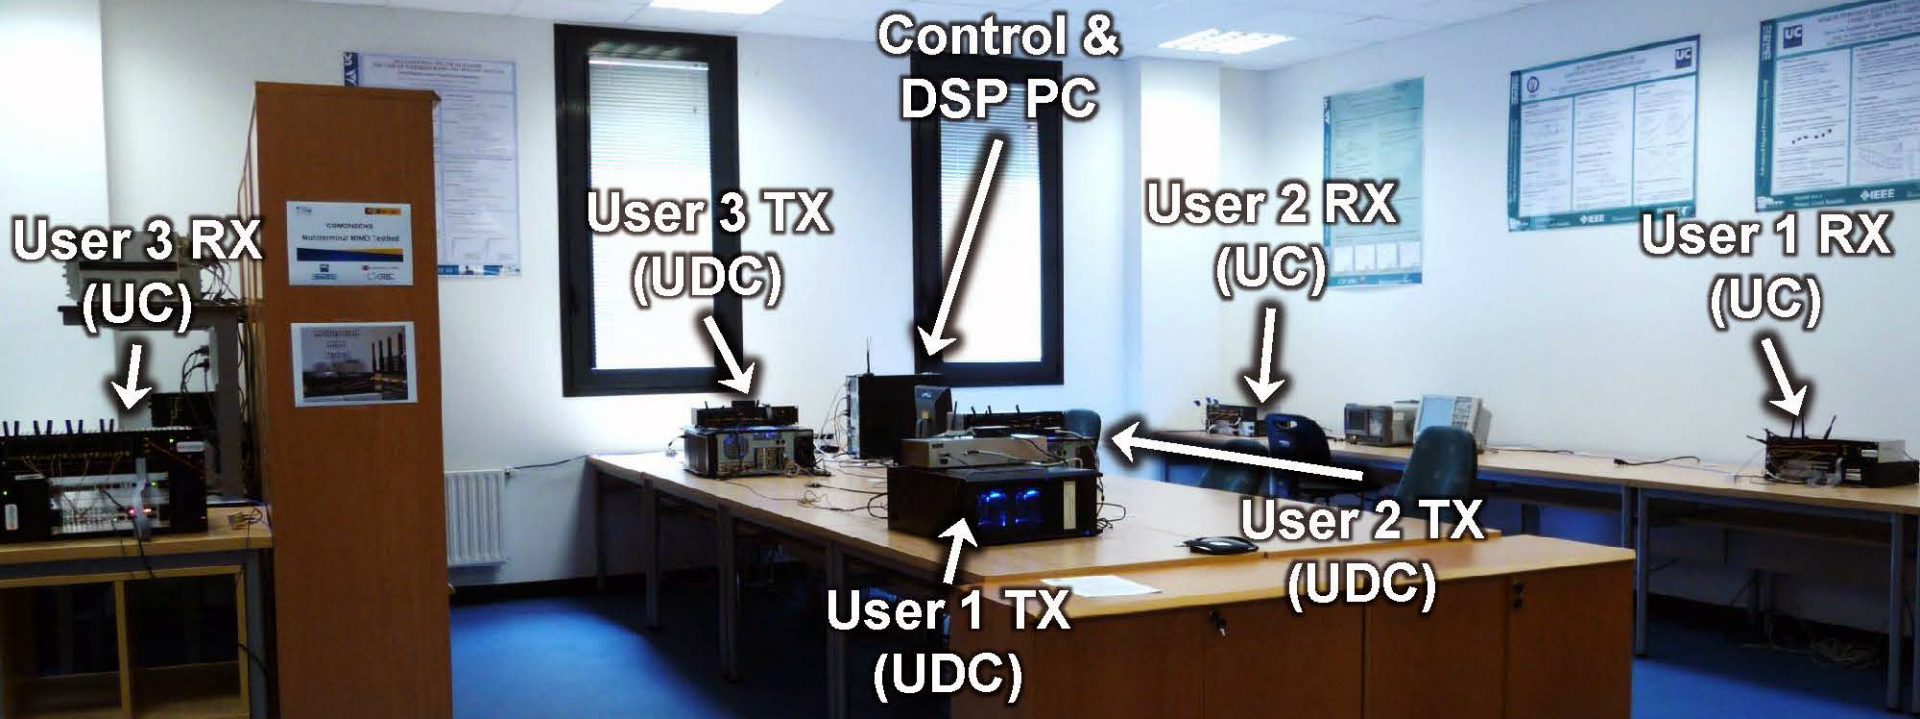

Supplement: MOESM8 [file 11899084]
